# Supplementary material for: Implementation of a conductivity cell electrode as an ion chromatography detector
Source: Royal Society of Chemistry journal article supplement (doi:10.1039/d1ay01974k), 2022-01-01
Supplement: d1ay01974k2.pdf [file d1ay01974k2.pdf]

1 **Electronic Supplementary**

2

3

**Implementation of conductivity cell electrode  
as ion chromatographic detector**

4

5

6 Daisuke Kozaki,\*<sup>a</sup> Souma Tanihata,<sup>b</sup> Yuki Sago,<sup>c</sup> Taku Fujiwara,<sup>d</sup> Masanobu Mori,<sup>a</sup> Atushi  
7 Yamamoto<sup>b</sup>

8

9 <sup>a</sup> Department of Chemistry and Biotechnology, Graduate School of Science and Technology, Kochi  
10 University, 2-5-1 Akebono-cho, Kochi City, Kochi 780-8520, Japan. E-mail: daisuke.2-10@kochi-  
11 u.ac.jp.

12 <sup>b</sup> Department of Food & Nutritional Sciences, College of Bioscience and Biotechnology, Chubu  
13 University, 1200 Matsumoto-cho, Kasugai, Aichi 487-8501, Japan.

14 <sup>c</sup> Graduate School of Sciences and Technology for Innovation, Yamaguchi University, Yoshida 1677-  
15 1 Yamaguchi, 753-8515, Japan.

16 <sup>d</sup> Department of Environmental Engineering, Kyoto University, C1-222, Nishikyo-ku, Kyoto, 615-  
17 8540, Japan.

18

19 Table S1 Specification of conductivity cell electrode.

| Specifications                    |                                                 |
|-----------------------------------|-------------------------------------------------|
| Product name                      | 3574-10C Conductivity Cell (Flow Type)          |
| Manufacturing Company             | HORIBA Advanced Techno Co., Ltd.                |
| Cell Constant (cm <sup>-1</sup> ) | 10                                              |
| Measurement Range                 | 10 μS/cm to 100mS/cm                            |
| Sample Volume Required (mL)       | 0.25                                            |
| Temperature Sensor                | ---                                             |
| Temperature Range (°C)            | 0 to 80                                         |
| Cable Length (m)                  | 1.0                                             |
| Cell Material                     | Platinum coated with platinum black, glass body |

20

21

22

23 Table S2 Analytical results of natural mineral water by using CCE and CD. <sup>13</sup>

| Natural mineral water | Type of detection equipment | Ion concentraton (mM)         |                 |                              |                 |                              |                |                  |                  |
|-----------------------|-----------------------------|-------------------------------|-----------------|------------------------------|-----------------|------------------------------|----------------|------------------|------------------|
|                       |                             | SO <sub>4</sub> <sup>2-</sup> | Cl <sup>-</sup> | NO <sub>3</sub> <sup>-</sup> | Na <sup>+</sup> | NH <sub>4</sub> <sup>+</sup> | K <sup>+</sup> | Mg <sup>2+</sup> | Ca <sup>2+</sup> |
| Sample 1              | CCE                         | 0.142                         | 0.307           | 0.0523                       | 0.283           | —*                           | 0.0218         | 1.10             | 2.29             |
|                       | CD                          | 0.141                         | 0.306           | 0.0634                       | 0.247           | —*                           | 0.0257         | 1.08             | 2.20             |
| Sample 2              | CCE                         | 0.118                         | 0.162           | 0.0491                       | 0.527           | —*                           | —**            | 0.0945           | 0.226            |
|                       | CD                          | 0.116                         | 0.148           | 0.0517                       | 0.482           | —*                           | —**            | 0.109            | 0.228            |
| Sample 3              | CCE                         | 0.0255                        | 0.164           | 0.0596                       | 0.272           | —*                           | 0.0847         | 0.107            | 0.154            |
|                       | CD                          | 0.0245                        | 0.165           | 0.0623                       | 0.253           | —*                           | 0.0788         | 0.100            | 0.156            |

24

25 \*Under the detection limit of NH<sub>4</sub><sup>+</sup> (33.1 μM), \*\*Under the detection limit of K<sup>+</sup> (42.5 μM)

26

27

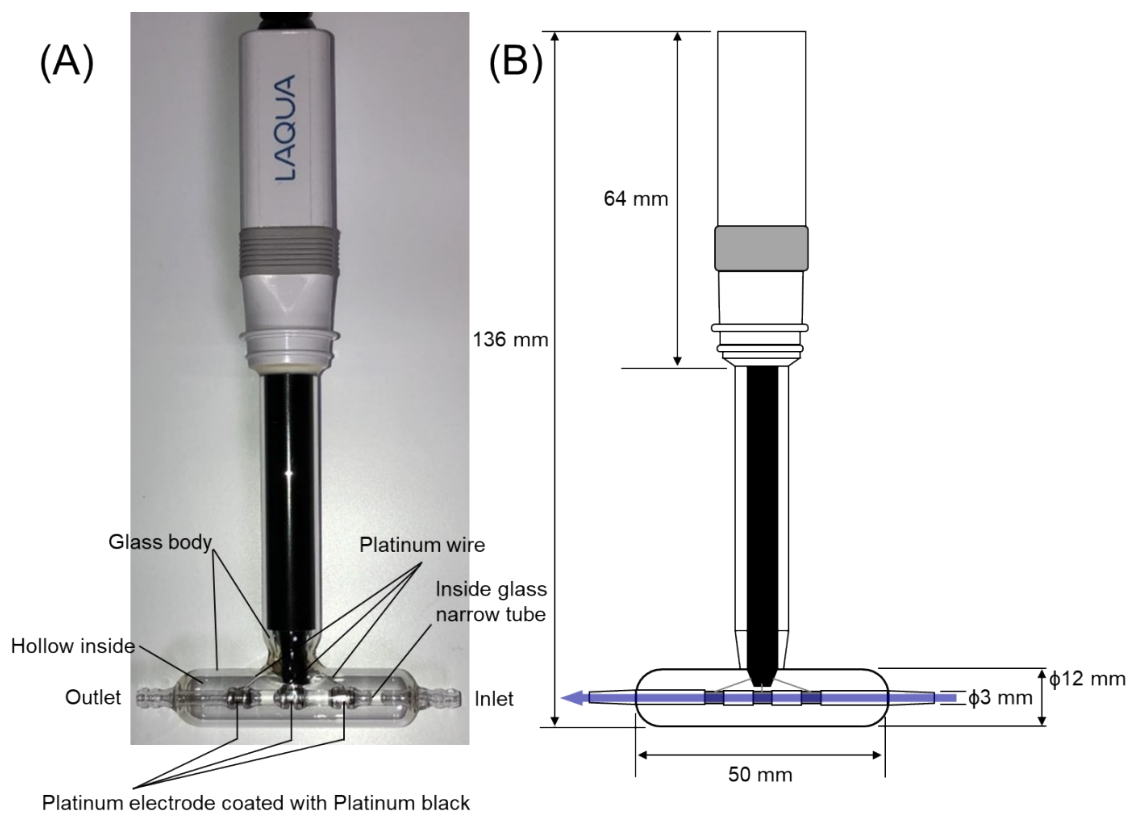

28

29 Fig. S1 (A) Detail structure and (B) dimensions of the conductivity cell electrode.

30

31

32

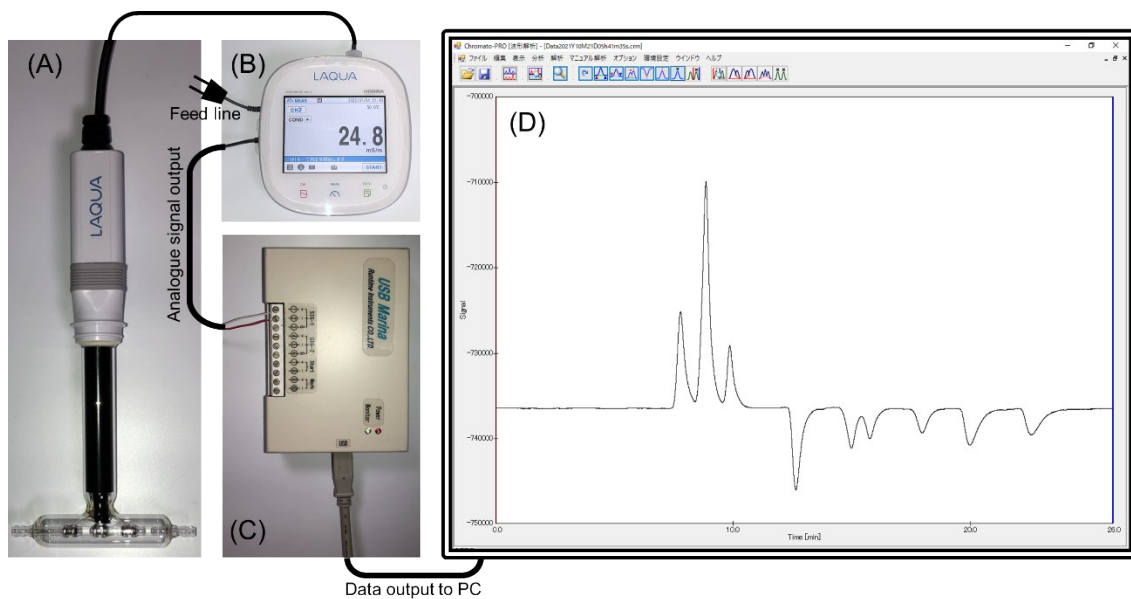

33

34 Fig. S2 Data transfer from the conductivity cell electrode to the chromatography workstation.

35 (A) Conductivity cell electrode (LAQUA 3574-10C, Horiba Ltd., Kyoto, Japan), (B) conductivity cell

36 electrode monitor (COND METER DS-72, Horiba Ltd., Kyoto, Japan), (C) analogue signal receiver

37 (USB Marina, Runtime Instruments, Co. Ltd., Tokyo, Japan), and (D) chromatography workstation

38 (Chromato-PRO, Runtime Instruments, Co. Ltd., Tokyo, Japan).

39

40
